# Supplementary material for: Human airway tuft cells influence the mucociliary clearance through cholinergic signalling
Source: Springer Nature journal article supplement (doi:10.1186/s12931-023-02570-8), 2023-11-04
Supplement: MOESM1 [file 26264854]

**Suppl. Table 1: Primer sequences**

| gene name | species | forward                 | reverse                 | size   | nucelotide reference |
|-----------|---------|-------------------------|-------------------------|--------|----------------------|
| B2m       | mouse   | ATTCACCCCCACTGAGACTG    | GCTATTTCTTTCTGCGTGCAT   | 192 bp | NM_009735.3          |
| Chat      | mouse   | GACCAGCTAAGGTTTGCAGC    | CAGGAAGCCGGTATGATGAGA   | 163 bp | NM_009891.2          |
| Slc18a3   | mouse   | TTGATCGCATGAGCTACGAC    | AGGCTCCTCGGGATACTTGT    | 188 bp | NM_021712.3          |
| Tas2r105  | mouse   | GACTGGCTTCCTTCTCATCG    | GCAAACACCCCAAGAAAA      | 284 bp | NM_020501.1          |
| Tas2r108  | mouse   | TGGATGCAAACAGTCTCTGG    | GGTGAGGGCTGAAATCAGAA    | 158 bp | NM_020502.1          |
| Trpm5     | mouse   | TGAGGAACGACCTTTGGCTA    | ACACGGATCTTGGTGGATGT    | 183 bp | NM_020277.2          |
| Gnat3     | mouse   | TCATCCATAAGAATGGTTACAGC | CCCACAGTCGTTAATGATTTTC  | 231 bp | NM_001081143.1       |
| Chrm1     | mouse   | AGAAGAGGCTGCCACAGGTA    | CAGACCCACCTGGACTTTA     | 198 bp | NM_001112697.1       |
| Chrm2     | mouse   | GAATGGGGATGAAAAGCAGA    | GCAGGGTGCACAGAAGGTAT    | 192 bp | NM_001411690.1       |
| Chrm3     | mouse   | CACAGCCAAGACCTCTGACA    | ATGATGTTGTAGGGGGTCCA    | 222 bp | NM_033269.4          |
| Actb      | mouse   | GTGGGAATGGGTCAGAAGG     | GGCATACAGGGACAGCACA     | 300 bp | NM_007393.5          |
|           |         |                         |                         |        |                      |
|           |         |                         |                         |        |                      |
| B2M       | human   | GGCATTCTGAAGCTGACAG     | TGGATGACGTGAGTAAACCTG   | 135 bp | NM_004048.4          |
| CHAT      | human   | AAACCTACCTGATGAGCAACC   | GTTGTAGCAGGCACCATACC    | 116 bp | NM_020549.5          |
| SLC18A3   | human   | CTCATGCTAGACCCCTACATTG  | TCGTATGCTTCATCCACGTG    | 106 bp | NM_003055.3          |
| GNAT3     | human   | TGAAAGCCATGACTACCCTTG   | AGCCAGTTGAGGTGTCATG     | 119 bp | NM_001102386.3       |
| TRPM5     | human   | AGAACTTCTGAGCAAGATGG    | TGACTCCAGACACTTGTATGC   | 167 bp | XM_047426859.1       |
| POU2F3    | human   | AGGAGAAGCGAATCAACTGC    | GGGAACAGGATGACGTTACTG   | 150 bp | NM_001244682.2       |
| IRAG2     | human   | AGCAAGAATACATCAGACACCC  | CCAGAGATAAGGCATCCAGC    | 77 bp  | NM_001366544.2       |
| DCLK1     | human   | CATTGCAGAGACTGGATACGG   | ACCTGCCCCATCAAATCTG     | 144 bp | NM_001330071.2       |
| ACTB      | human   | ACCTTCTACAATGAGCTGCG    | CCTGGATAGCAACGTACATGG   | 148 bp | NM_001101.5          |
| TAS2R4    | human   | GTGGTTTCTTTGGTCTTGAGC   | CCTACATGAGCTTCCGTCTG    | 149 bp | NM_016944.2          |
| TAS2R5    | human   | CTCTGGGATGCTGATTGTCTC   | CAGGTGAAGTAAGAGGAAGCAG  | 136 bp | NM_018980.3          |
| TAS2R10   | human   | CATTTCCCTTTGGAGACACAAC  | ATGAGCTTCTGTGTTGGAGTC   | 76 bp  | NM_023921.2          |
| TAS2R38   | human   | GTTGACTCTAACTCGCATCCG   | GCCTCTTCACTACATCCCAA    | 140 bp | NM_176817.5          |
| TAS2R39   | human   | ATTACTGGATTGATACCCTGGC  | TGTTTTCTTAGTGGAGTTGGAGG | 138 bp | NM_176881.2          |
| CHRM1     | human   | ATGCCTCCGTCATGAATCTG    | CAGAGCACAAGGAAACCAG     | 142 bp | NM_000738.3          |
| CHRM2     | human   | CACAAAACCTCTGACCTACCC   | ACAGTTCTCACCCCTACAATG   | 138 bp | NM_001006630.2       |
| CHRM3     | human   | CAGATGGTTAGGAGAAGTGAGC  | AGGGTGACTAGGAGAATAGGG   | 118 bp | NM_001375978.1       |

reverse oligo mut

forward oligo mut

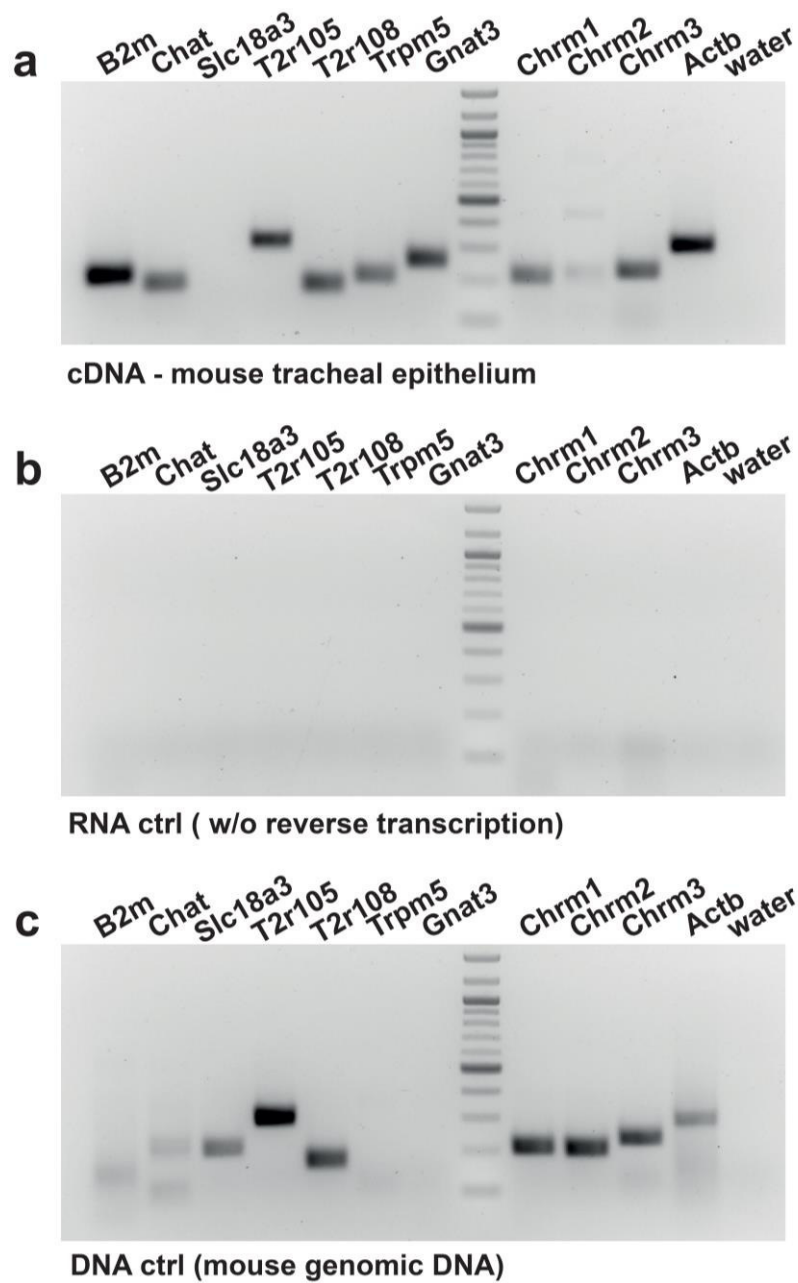

**Suppl. Fig. 1:** Qualitative analysis of the gene transcription profile of mouse tracheal epithelium including assay controls. All pictures represent endpoint PCR results separated on an agarose gel. (a) cDNA of a DNaseI-treated RNA sample of mouse tracheal epithelium indicates detectable transcription of all tested genes despite solute carrier family 18 member a3 transcripts. (b) Specificity of amplified gene transcripts was assayed applying amplification strategies to DNaseI-treated but not reversely transcribed RNA to estimate potential contamination by genomic DNA during the process of RNA extraction. The absence of any amplicon suggests that results in (a) indicate the successful reverse transcription of RNA from tracheal epithelium. (c) Qualitative assessment of potential interference by genomic DNA during the amplification process leads to potentially unspecific bands in cases in which gene assays could have not been set up in an intron spanning fashion, this included Slc18a3, both taste receptor genes and all three muscarinic ACh receptor genes. The coding sequence of these genes is present on only one exon.

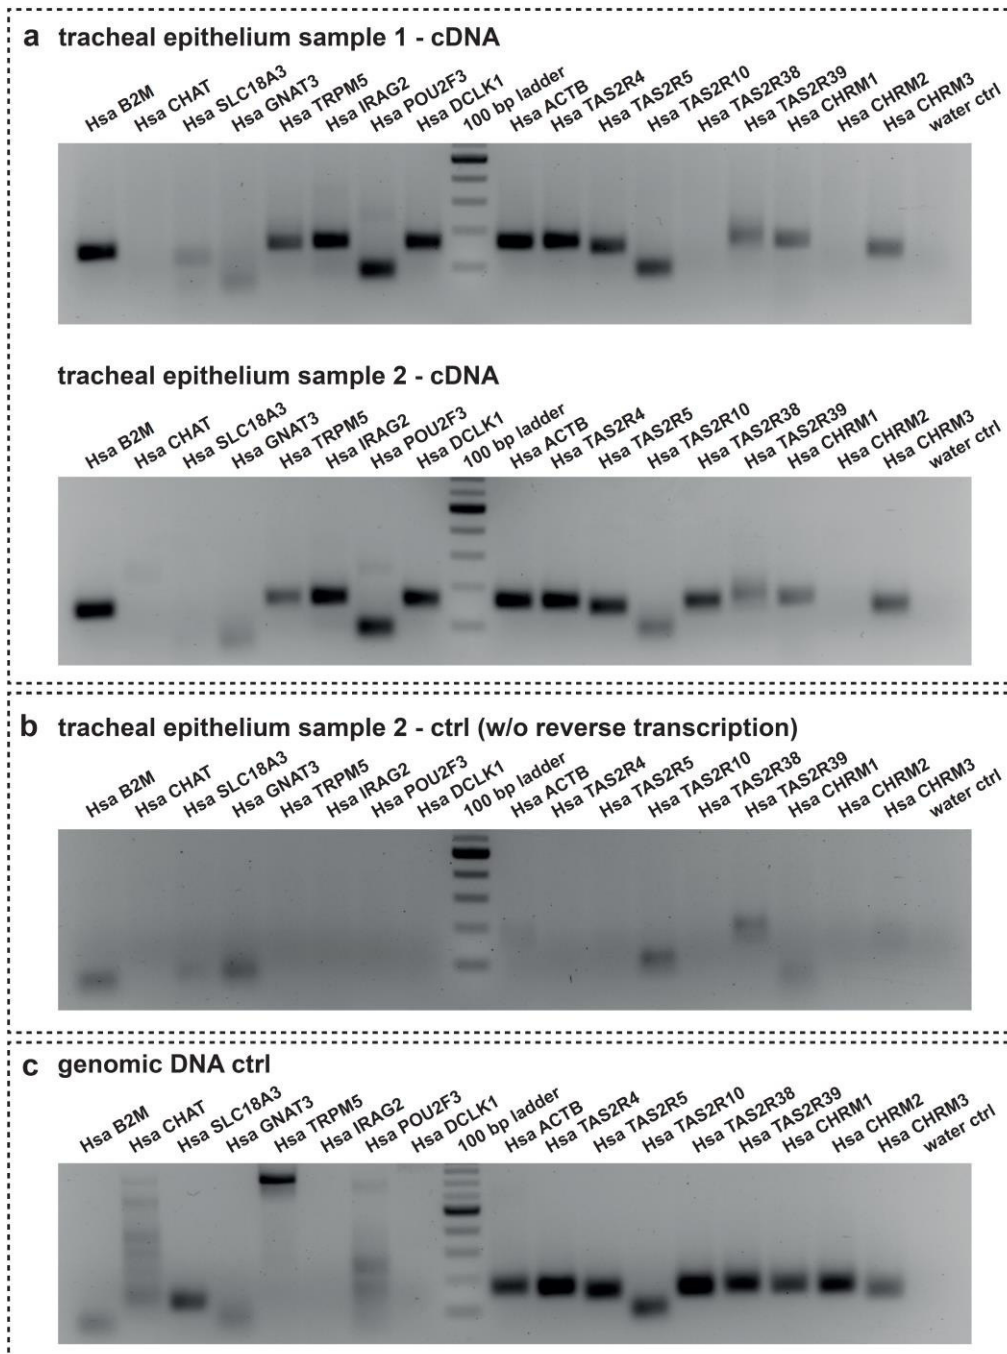

**Suppl. Fig. 2:** Qualitative analysis of the gene transcription profile of human tracheal epithelium including assay controls. All pictures represent endpoint PCR results separated on an agarose gel. (a) Set of tested genes using DNaseI-treated RNA samples isolated from two human body donors that have been transcribed into cDNA (Fig. 4). (b) Control reaction applying DNaseI-treated RNA samples that have not been reversely transcribed into cDNA to assess unspecific amplification, i.e., false positive reactions due to amplification from, for example, genomic DNA contamination. (c) Application of amplification strategies using human genomic DNA to compare the presence or absence of amplicons from transcripts deriving from genes in which a selection of intron-spanning assays was not possible, e.g., SLC18A3, all depicted taste receptors as well as muscarinic ACh receptors. Comparison of (a), (b) and (c) reveals that testing for TAS2R10 and TAS2R39 resulted in an unspecific signal, yet different from genomic contamination due to size differences of its amplicons in (a).

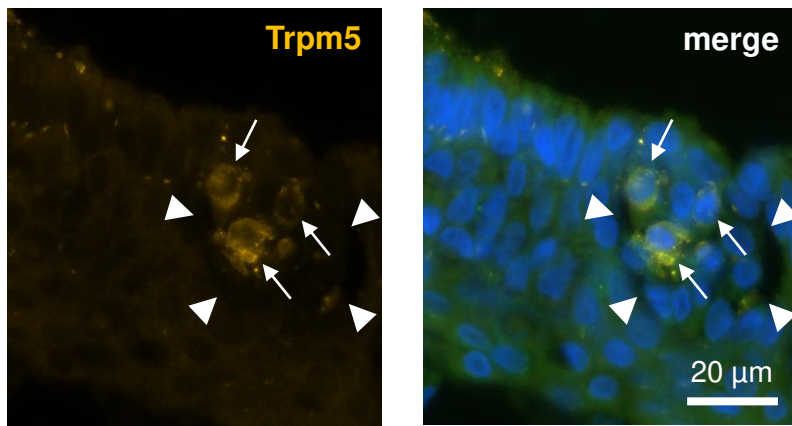

**Suppl. Fig. 3:** Taste bud in a human circumvallate papilla. TRPM5<sup>+</sup> cells are visible in a taste bud. The arrowheads outline the taste bud. Immunofluorescence staining for TRPM5 (yellow, arrows) in epithelial cells of a taste bud. Merge: DAPI for visualisation of the nuclei, tissue autofluorescence in the green emission channel for representation of the epithelium. Scale bar: 20  $\mu\text{m}$
